# Supplementary material for: Amyloid modifier SERF1a interacts with polyQ-expanded huntingtin-exon 1 via helical interactions and exacerbates polyQ-induced toxicity
Source: Commun Biol. 2023 Jul 21;6:767. doi: 10.1038/s42003-023-05142-0 (PMC10361993; doi:10.1038/s42003-023-05142-0)
Supplement: Supplementary file 4 — Supplementary Data 1 [file 42003_2023_5142_MOESM4_ESM.xlsx]

## Sheet: Fig. 1a
Figure 1a	ThT fluoresence signals
	TrxHtt15Q					TrxHttex1-15Q+SERF1a
	Time (hr)	R1	R2	R3		Time (hr)	R1	R2	R3
	0	1.11167	-0.689	1.2145		0	1.64333	1.16083	1.31117
	3	-5.29417	-8.09333	-6.27467		3	-3.43467	-5.77467	-6.38533
	6	-7.8195	-9.26567	-7.31633		6	-6.51817	-7.08867	-7.574
	12	-7.85	-10.1465	-7.51133		12	-8.44417	-8.81333	-8.041
	18	-9.95	-10.6865	-10.1233		18	-8.8465	-8.5445	-10.0132
	24	-9.393	-10.6142	-9.08967		24	-8.49033	-9.774	-9.46533
	31	-10.4483	-11.6788	-10.8637		31	-9.4775	-9.29633	-10.8285
	TrxHtt29Q					TrxHttex1-29Q+SERF1a
	Time (hr)	R1	R2	R3		Time (hr)	R1	R2	R3
	0	3.07417	-0.784	-1.05383		0	4.36967	-0.461667	-0.8085
	3	-4.5275	-8.03017	-6.48983		3	-4.23983	-7.61717	-8.3995
	6	-5.23517	-8.148	-5.93767		6	-5.7785	-7.505	-8.61883
	12	-5.362	-8.825	-6.43567		12	-5.12	-7.79433	-5.55667
	18	-6.41183	-8.12033	-9.593		18	-5.54317	-7.14783	-7.94667
	24	-3.24	-7.2125	-8.0045		24	-1.20783	-4.57267	-4.42233
	31	-1.81517	-5.0175	-10.6877		31	0.633	-1.22167	-6.15817
	TrxHtt39Q					TrxHttex1-39Q+SERF1a
	Time (hr)	R1	R2	R3		Time (hr)	R1	R2	R3
	0	5.883	-1.64767	-1.06183		0	3.61983	-2.7935	0.2245
	3	4.6145	-4.3625	2.45683		3	1.785	-5.39633	23.9522
	6	13.0932	-0.410667	12.286		6	12.9063	0.812833	94.4118
	12	55.4545	18.6023	53.537		12	76.6503	34.9662	319.615
	18	72.26	31.639	46.2305		18	110.764	68.628	259.733
	24	121.488	53.9832	82.4532		24	199.284	135.342	328.536
	31	158.003	81.8247	80.0583		31	255.062	211.902	260.594
	TrxHtt49Q					TrxHttex1-49Q+SERF1a
	Time (hr)	R1	R2	R3		Time (hr)	R1	R2	R3
	0	-8.38983	-2.34133	13.4515		0	-7.36683	0.834167	11.3867
	3	-7.937	17.0747	108.236		3	-8.923	57.2215	176.609
	6	1.98817	42.1787	166.723		6	7.59667	126.089	290.071
	12	135.036	125.598	304.792		12	272.274	282.36	355.486
	18	222.356	160.093	256.624		18	323.346	328.078	279.237
	24	354.615	201.573	337.744		24	397.723	380.667	345.08
	31	383.452	226.677	267.466		31	394.465	421.19	272.196

## Sheet: Fig. 1e
Figure 1e	CD spectra
		TrxHttex1-15Q								TrxHttex1-15Q+SERF1a								TrxHttex1-29Q								TrxHttex1-29Q+SERF1a								TrxHttex1-39Q								TrxHttex1-39Q+SERF1a
Wavelength (nm)	0 hr	3 hr	6 hr	12 hr	24 hr	40 hr		Wavelength (nm)	0 hr	3 hr	6 hr	12 hr	24 hr	40 hr		Wavelength (nm)	0 hr	3 hr	6 hr	12 hr	24 hr	40 hr		Wavelength (nm)	0 hr	3 hr	6 hr	12 hr	24 hr	40 hr		Wavelength (nm)	0 hr	3 hr	6 hr	12 hr	24 hr	40 hr		Wavelength (nm)	0 hr	3 hr	6 hr	12 hr	24 hr	40 hr		Wavelength (nm)	0 hr
250	-0.32929	0.40365	0.11197	-0.32036	-0.01593	0.32258		250	-0.53265	0.08593	-0.69843	-0.05513	-0.47618	-0.09039		250	-0.2828	-0.33826	-0.51739	-0.09985	-0.43838	-0.23764		250	-0.2828	-0.33826	-0.51739	-0.09985	-0.43838	-0.23764		250	0.06528	-0.09265	-1.03903	-0.17399	-0.1364	0.21816		250	-1.71682	-0.57862	-0.57448	-0.80418	-0.69963	-0.16269		250	-0.16427
249	-0.4837	0.26284	-0.01656	-0.42407	-0.13267	0.19455		249	-0.62894	0.00509	-0.79921	-0.21528	-0.57112	-0.29597		249	-0.3739	-0.48895	-0.65355	-0.30056	-0.56296	-0.38113		249	-0.3739	-0.48895	-0.65355	-0.30056	-0.56296	-0.38113		249	-0.04457	-0.21532	-1.13259	-0.26713	-0.25398	0.0657		249	-1.83884	-0.68489	-0.66547	-0.98326	-0.83626	-0.35018		249	-0.28416
248	-0.71266	0.05504	-0.217	-0.62828	-0.31348	-0.02015		248	-0.79292	-0.12597	-0.95928	-0.42265	-0.73876	-0.58731		248	-0.52274	-0.72893	-0.85547	-0.57632	-0.74779	-0.64028		248	-0.52274	-0.72893	-0.85547	-0.57632	-0.74779	-0.64028		248	-0.27885	-0.44847	-1.31504	-0.44731	-0.42585	-0.16143		248	-2.0623	-0.87359	-0.80208	-1.20549	-1.06236	-0.60793		248	-0.50207
247	-0.96523	-0.20333	-0.44855	-0.89723	-0.51802	-0.29791		247	-1.05071	-0.31195	-1.20245	-0.6829	-0.98722	-0.91754		247	-0.76548	-1.0251	-1.12894	-0.89472	-0.99463	-0.90372		247	-0.76548	-1.0251	-1.12894	-0.89472	-0.99463	-0.90372		247	-0.57565	-0.7303	-1.58008	-0.70172	-0.63434	-0.42514		247	-2.40012	-1.15961	-1.01482	-1.49493	-1.38189	-0.89119		247	-0.76824
246	-1.28028	-0.5215	-0.75825	-1.22689	-0.82204	-0.6751		246	-1.39398	-0.57848	-1.49704	-0.99714	-1.29543	-1.30828		246	-1.11154	-1.38522	-1.46583	-1.28599	-1.31385	-1.21464		246	-1.11154	-1.38522	-1.46583	-1.28599	-1.31385	-1.21464		246	-0.95864	-1.06108	-1.94734	-1.04765	-0.9436	-0.77636		246	-2.84298	-1.55619	-1.32327	-1.8681	-1.77783	-1.25627		246	-1.06427
245	-1.67074	-0.88243	-1.17533	-1.6326	-1.23328	-1.13602		245	-1.79263	-0.91454	-1.90201	-1.42937	-1.69971	-1.81317		245	-1.5293	-1.80105	-1.91529	-1.81523	-1.75779	-1.66227		245	-1.5293	-1.80105	-1.91529	-1.81523	-1.75779	-1.66227		245	-1.41635	-1.4647	-2.40903	-1.48193	-1.33997	-1.18821		245	-3.34574	-2.0177	-1.73905	-2.37877	-2.28871	-1.76816		245	-1.38963
244	-2.16129	-1.32131	-1.67245	-2.13746	-1.71093	-1.67728		244	-2.22819	-1.29567	-2.41462	-2.00965	-2.19195	-2.39048		244	-2.01802	-2.23292	-2.46622	-2.50543	-2.3019	-2.21207		244	-2.01802	-2.23292	-2.46622	-2.50543	-2.3019	-2.21207		244	-1.98272	-1.98001	-2.95333	-1.99849	-1.82958	-1.70478		244	-3.94072	-2.53197	-2.28374	-3.04413	-2.90817	-2.41718		244	-1.79234
243	-2.75664	-1.8841	-2.24563	-2.75514	-2.26374	-2.36415		243	-2.75168	-1.72261	-2.99068	-2.6427	-2.75745	-3.15456		243	-2.60248	-2.78337	-3.09848	-3.2775	-2.93313	-2.91206		243	-2.60248	-2.78337	-3.09848	-3.2775	-2.93313	-2.91206		243	-2.68001	-2.64793	-3.63144	-2.62934	-2.44206	-2.36591		243	-4.68358	-3.13887	-2.92788	-3.7581	-3.64733	-3.24916		243	-2.25528
242	-3.58115	-2.66364	-2.98375	-3.55095	-3.02655	-3.30525		242	-3.40191	-2.24866	-3.66989	-3.42947	-3.44535	-4.12991		242	-3.31231	-3.4882	-3.82859	-4.24387	-3.68975	-3.81401		242	-3.31231	-3.4882	-3.82859	-4.24387	-3.68975	-3.81401		242	-3.53135	-3.47995	-4.51635	-3.46045	-3.25705	-3.21575		242	-5.54211	-3.8897	-3.69979	-4.66217	-4.51655	-4.30471		242	-2.85386
241	-4.53941	-3.54021	-3.81661	-4.44641	-3.92891	-4.34631		241	-4.13168	-2.90372	-4.48218	-4.32799	-4.30065	-5.29096		241	-4.14848	-4.38672	-4.64998	-5.36989	-4.63645	-4.89826		241	-4.14848	-4.38672	-4.64998	-5.36989	-4.63645	-4.89826		241	-4.50771	-4.42121	-5.49091	-4.42651	-4.20351	-4.20831		241	-6.55408	-4.88162	-4.59638	-5.78159	-5.54235	-5.57636		241	-3.58031
240	-5.56256	-4.46666	-4.75156	-5.40416	-4.86986	-5.46946		240	-4.93457	-3.69843	-5.4353	-5.40362	-5.28104	-6.60362		240	-5.12547	-5.42553	-5.643	-6.66762	-5.70594	-6.07702		240	-5.12547	-5.42553	-5.643	-6.66762	-5.70594	-6.07702		240	-5.58496	-5.44136	-6.52856	-5.46706	-5.23446	-5.30876		240	-7.71217	-6.04723	-5.6483	-7.10342	-6.79044	-7.01672		240	-4.37166
239	-6.7485	-5.5357	-5.8476	-6.5058	-5.9744	-6.7878		239	-5.89737	-4.56773	-6.46394	-6.62584	-6.40617	-8.11071		239	-6.21057	-6.59463	-6.82594	-8.15874	-6.95377	-7.47391		239	-6.21057	-6.59463	-6.82594	-8.15874	-6.95377	-7.47391		239	-6.8573	-6.688	-7.7476	-6.68	-6.4454	-6.5579		239	-9.02737	-7.36383	-6.80324	-8.58064	-8.25937	-8.67821		239	-5.305
238	-7.97818	-6.66478	-6.97298	-7.67968	-7.09768	-8.19128		238	-6.97679	-5.53369	-7.59843	-7.96814	-7.72563	-9.7048		238	-7.45649	-7.96779	-8.15033	-9.80084	-8.38023	-8.9887		238	-7.45649	-7.96779	-8.15033	-9.80084	-8.38023	-8.9887		238	-8.21428	-8.04948	-9.06928	-8.00238	-7.72518	-7.91438		238	-10.5285	-8.91079	-8.09903	-10.2178	-9.92753	-10.4155		238	-6.31718
237	-9.31356	-7.86696	-8.19956	-8.98476	-8.35576	-9.69436		237	-8.19508	-6.60624	-8.85553	-9.33541	-9.15092	-11.3956		237	-8.88028	-9.45784	-9.61093	-11.5208	-9.91642	-10.5646		237	-8.88028	-9.45784	-9.61093	-11.5208	-9.91642	-10.5646		237	-9.73156	-9.55626	-10.5895	-9.46966	-9.12646	-9.42406		237	-12.2208	-10.626	-9.52273	-11.9694	-11.7874	-12.2774		237	-7.47796
236	-10.7627	-9.16202	-9.53162	-10.3859	-9.77542	-11.3048		236	-9.52721	-7.73345	-10.2099	-10.7777	-10.6701	-13.1755		236	-10.4148	-11.0389	-11.169	-13.4143	-11.6008	-12.2456		236	-10.4148	-11.0389	-11.169	-13.4143	-11.6008	-12.2456		236	-11.4045	-11.1785	-12.2556	-11.086	-10.681	-11.0597		236	-14.065	-12.4782	-11.0597	-13.8943	-13.7807	-14.2912		236	-8.71072
235	-12.2317	-10.4727	-10.9172	-11.791	-11.2161	-12.9456		235	-10.935	-8.90497	-11.6571	-12.2885	-12.3144	-15.0074		235	-11.9927	-12.6637	-12.8792	-15.4307	-13.449	-14.0305		235	-11.9927	-12.6637	-12.8792	-15.4307	-13.449	-14.0305		235	-13.1397	-12.8472	-13.9712	-12.7427	-12.2572	-12.738		235	-15.966	-14.4084	-12.7369	-15.9257	-15.9227	-16.477		235	-9.98287
234	-13.7715	-11.8373	-12.2956	-13.2681	-12.6282	-14.6199		234	-12.3484	-10.0783	-13.1376	-13.8991	-13.9622	-16.9049		234	-13.676	-14.3461	-14.6641	-17.473	-15.3499	-15.8702		234	-13.676	-14.3461	-14.6641	-17.473	-15.3499	-15.8702		234	-14.9128	-14.6002	-15.7202	-14.4647	-13.8725	-14.4789		234	-17.9592	-16.3961	-14.4854	-18.0394	-18.1501	-18.8137		234	-11.2713
233	-15.3587	-13.2813	-13.6584	-14.8195	-14.103	-16.3647		233	-13.7191	-11.2165	-14.5863	-15.4975	-15.5289	-18.7504		233	-15.3545	-16.0596	-16.4044	-19.4776	-17.2429	-17.6738		233	-15.3545	-16.0596	-16.4044	-19.4776	-17.2429	-17.6738		233	-16.7965	-16.4042	-17.5274	-16.2819	-15.5521	-16.3425		233	-19.9667	-18.3564	-16.2142	-20.2389	-20.3997	-21.18		233	-12.601
232	-16.9115	-14.6884	-15.007	-16.3643	-15.5623	-18.0887		232	-15.051	-12.3526	-16.0013	-17.1578	-17.0753	-20.5038		232	-16.9741	-17.7854	-18.0075	-21.5194	-19.0885	-19.4144		232	-16.9741	-17.7854	-18.0075	-21.5194	-19.0885	-19.4144		232	-18.6457	-18.1525	-19.346	-18.0687	-17.2132	-18.1939		232	-21.9649	-20.2971	-17.8694	-22.5605	-22.6763	-23.4033		232	-13.9332
231	-18.3773	-15.9545	-16.2676	-17.7738	-16.9627	-19.6638		231	-16.3475	-13.4647	-17.4283	-18.6631	-18.4844	-22.2576		231	-18.6297	-19.4759	-19.5532	-23.3523	-20.7844	-21.1341		231	-18.6297	-19.4759	-19.5532	-23.3523	-20.7844	-21.1341		231	-20.3577	-19.8773	-21.0687	-19.8024	-18.8259	-19.9722		231	-23.9289	-22.1968	-19.5097	-24.8066	-24.938	-25.6769		231	-15.1962
230	-19.7543	-17.1759	-17.4636	-19.0949	-18.2634	-21.1909		230	-17.5128	-14.5151	-18.7915	-20.045	-19.752	-23.862		230	-20.1827	-21.0187	-21.1109	-25.0763	-22.3401	-22.7342		230	-20.1827	-21.0187	-21.1109	-25.0763	-22.3401	-22.7342		230	-22.0027	-21.4918	-22.6564	-21.4859	-20.439	-21.6459		230	-25.7647	-23.9698	-21.1231	-26.9727	-27.0462	-27.973		230	-16.3838
229	-20.9923	-18.2984	-18.5341	-20.2936	-19.4944	-22.6453		229	-18.594	-15.4928	-20.0276	-21.3025	-20.9262	-25.3431		229	-21.5539	-22.4349	-22.6225	-26.6537	-23.8061	-24.2606		229	-21.5539	-22.4349	-22.6225	-26.6537	-23.8061	-24.2606		229	-23.5187	-22.9681	-24.0639	-22.9774	-21.8959	-23.1863		229	-27.4566	-25.6042	-22.6549	-28.9877	-28.9693	-30.1469		229	-17.4377
228	-21.9766	-19.184	-19.4625	-21.3144	-20.5438	-23.8189		228	-19.54	-16.33	-21.1839	-22.378	-22.0541	-26.733		228	-22.8128	-23.7701	-23.9867	-27.9305	-25.147	-25.5998		228	-22.8128	-23.7701	-23.9867	-27.9305	-25.147	-25.5998		228	-24.8425	-24.2734	-25.2709	-24.2715	-23.1567	-24.6157		228	-28.9617	-27.1215	-24.105	-30.7851	-30.8041	-32.2088		228	-18.3561
227	-22.9116	-20.0077	-20.425	-22.3488	-21.5565	-24.8773		227	-20.4212	-17.0697	-22.1181	-23.2928	-23.0035	-28.0132		227	-23.8559	-24.8773	-25.153	-29.0023	-26.2539	-26.8491		227	-23.8559	-24.8773	-25.153	-29.0023	-26.2539	-26.8491		227	-26.1318	-25.4432	-26.5116	-25.4792	-24.4091	-25.9779		227	-30.2496	-28.4449	-25.2958	-32.4725	-32.5666	-34.2306		227	-19.3087
226	-23.8066	-20.7883	-21.2791	-23.2379	-22.4283	-25.868		226	-21.2549	-17.7347	-22.8962	-24.157	-23.8574	-29.1038		226	-24.6946	-25.8483	-26.1257	-29.9472	-27.2614	-28.0535		226	-24.6946	-25.8483	-26.1257	-29.9472	-27.2614	-28.0535		226	-27.2703	-26.4084	-27.6225	-26.5514	-25.5382	-27.1671		226	-31.3307	-29.6425	-26.2834	-34.0687	-34.1384	-36.1288		226	-20.1462
225	-24.6014	-21.4935	-22.0129	-23.9873	-23.1724	-26.8482		225	-22.0462	-18.3572	-23.6159	-24.9857	-24.7517	-30.0539		225	-25.481	-26.7222	-27.0095	-30.5652	-28.1358	-29.1385		225	-25.481	-26.7222	-27.0095	-30.5652	-28.1358	-29.1385		225	-28.0894	-27.1763	-28.6367	-27.4792	-26.4006	-28.2227		225	-32.2557	-30.7253	-27.2174	-35.477	-35.6728	-37.94		225	-20.8461
224	-25.4191	-22.2203	-22.7809	-24.7247	-23.9344	-27.7366		224	-22.7322	-18.8572	-24.2989	-25.9042	-25.5803	-31.031		224	-26.2831	-27.5375	-27.7842	-31.0942	-28.929	-30.0734		224	-26.2831	-27.5375	-27.7842	-31.0942	-28.929	-30.0734		224	-28.7922	-27.8532	-29.6006	-28.4334	-27.1494	-29.2365		224	-33.0187	-31.5903	-28.1362	-36.9747	-37.0984	-39.5228		224	-21.3666
223	-26.3117	-23.0608	-23.5714	-25.4449	-24.6884	-28.6467		223	-23.292	-19.3981	-24.8981	-26.7834	-26.3318	-31.935		223	-26.9081	-28.2832	-28.3863	-31.5301	-29.7688	-30.9202		223	-26.9081	-28.2832	-28.3863	-31.5301	-29.7688	-30.9202		223	-29.5158	-28.5742	-30.4988	-29.3135	-27.9117	-30.2364		223	-33.528	-32.2947	-29.0216	-38.378	-38.3911	-40.8496		223	-21.9187
222	-27.1601	-23.9157	-24.3296	-26.187	-25.3495	-29.6629		222	-23.9485	-20.0014	-25.55	-27.6207	-27.1655	-32.7957		222	-27.5493	-28.8456	-29.0333	-31.9684	-30.6192	-31.647		222	-27.5493	-28.8456	-29.0333	-31.9684	-30.6192	-31.647		222	-30.0704	-29.1878	-31.2386	-30.1051	-28.6611	-31.1526		222	-33.9911	-32.9023	-29.8568	-39.5097	-39.572	-42.1092		222	-22.4974
221	-28.1129	-24.7928	-25.0494	-26.9139	-26.0374	-30.6797		221	-24.7134	-20.6573	-26.3026	-28.6042	-27.9139	-33.7777		221	-28.3504	-29.4771	-29.8492	-32.336	-31.4992	-32.5451		221	-28.3504	-29.4771	-29.8492	-32.336	-31.4992	-32.5451		221	-30.5327	-29.774	-31.928	-30.9042	-29.4029	-31.9756		221	-34.4789	-33.6424	-30.7247	-40.528	-40.5506	-43.2664		221	-23.0247
220	-29.0747	-25.7517	-25.8213	-27.6435	-26.9236	-31.6705		220	-25.4903	-21.3213	-27.1235	-29.6996	-28.7132	-34.8263		220	-29.2374	-30.3466	-30.7351	-32.8101	-32.4324	-33.5851		220	-29.2374	-30.3466	-30.7351	-32.8101	-32.4324	-33.5851		220	-31.0891	-30.4572	-32.5603	-31.6803	-30.1738	-32.7171		220	-34.9626	-34.3758	-31.4564	-41.5308	-41.4084	-44.2594		220	-23.4488
219	-30.0297	-26.6842	-26.5509	-28.5821	-27.9312	-32.5711		219	-26.276	-22.1549	-28.0467	-30.7409	-29.694	-36.0142		219	-30.2401	-31.3078	-31.7245	-33.3178	-33.4356	-34.5173		219	-30.2401	-31.3078	-31.7245	-33.3178	-33.4356	-34.5173		219	-31.6606	-31.415	-33.2848	-32.3279	-30.7478	-33.3201		219	-35.461	-35.0119	-32.1626	-42.3943	-42.1099	-45.262		219	-23.83
218	-30.8444	-27.4988	-27.3627	-29.6025	-28.9033	-33.6183		218	-26.9964	-23.0428	-29.0828	-31.5606	-30.6973	-37.3899		218	-31.2236	-32.5404	-32.7848	-33.6412	-34.4617	-35.3153		218	-31.2236	-32.5404	-32.7848	-33.6412	-34.4617	-35.3153		218	-32.446	-32.2418	-34.0228	-32.9537	-31.2737	-33.6969		218	-35.9535	-35.7668	-32.7884	-43.0315	-42.3541	-46.1533		218	-24.2002
217	-31.7611	-28.553	-28.3598	-30.6731	-29.959	-34.7441		217	-27.7529	-23.8819	-30.1996	-32.4158	-31.5544	-39.0621		217	-31.9656	-33.6403	-33.7946	-34.2107	-35.5107	-36.4691		217	-31.9656	-33.6403	-33.7946	-34.2107	-35.5107	-36.4691		217	-33.547	-32.8875	-34.8303	-33.5454	-32.0365	-33.9284		217	-36.5657	-36.481	-33.2076	-43.3806	-42.3293	-46.5385		217	-24.6828
216	-32.8415	-29.7076	-29.3221	-31.7906	-31.1963	-35.6996		216	-28.7118	-24.7826	-31.3208	-33.52	-32.4748	-40.988		216	-32.8936	-34.6529	-34.5064	-34.67	-36.5851	-37.4672		216	-32.8936	-34.6529	-34.5064	-34.67	-36.5851	-37.4672		216	-34.5481	-33.5768	-35.5985	-34.0622	-32.5918	-34.3217		216	-37.3891	-37.2533	-33.3544	-43.727	-42.3478	-46.5733		216	-25.185
215	-33.9366	-30.9001	-30.3278	-32.9561	-32.5285	-36.7693		215	-29.6913	-25.4978	-32.5103	-34.6792	-33.9863	-42.618		215	-34.0485	-35.4945	-34.9716	-35.616	-37.635	-38.2634		215	-34.0485	-35.4945	-34.9716	-35.616	-37.635	-38.2634		215	-35.3149	-34.2849	-36.3563	-34.523	-32.8709	-34.4519		215	-38.2953	-37.9173	-33.5175	-43.7406	-42.4959	-46.5801		215	-25.7342
214	-35.1396	-32.1205	-31.3189	-34.01	-33.7449	-38.3689		214	-30.7322	-26.2787	-33.628	-35.7	-35.7361	-44.0301		214	-35.2965	-36.5599	-35.826	-36.698	-38.5758	-38.6909		214	-35.2965	-36.5599	-35.826	-36.698	-38.5758	-38.6909		214	-35.9917	-35.0277	-37.0081	-35.038	-32.9326	-34.5315		214	-38.7986	-38.481	-33.9279	-43.8841	-41.8023	-45.2995		214	-26.1915
213	-36.1373	-33.4376	-32.3871	-35.0828	-35.1166	-39.547		213	-31.7929	-27.4362	-34.3843	-36.5633	-36.6708	-45.952		213	-36.4876	-37.6473	-36.8446	-36.7492	-39.9217	-38.8747		213	-36.4876	-37.6473	-36.8446	-36.7492	-39.9217	-38.8747		213	-36.9782	-35.9477	-38.0293	-35.7053	-33.2182	-34.3091		213	-39.4188	-39.0469	-34.2536	-43.1789	-40.0365	-42.6724		213	-26.7885
212	-37.1302	-34.8837	-34.0939	-36.172	-36.7604	-39.9483		212	-32.9555	-28.5814	-34.9648	-37.7429	-37.648	-45.7788		212	-37.765	-38.3067	-38.1335	-36.8751	-41.1296	-37.8497		212	-37.765	-38.3067	-38.1335	-36.8751	-41.1296	-37.8497		212	-37.947	-36.6666	-38.7796	-36.1493	-33.8327	-33.8852		212	-40.3706	-39.7985	-34.4705	-41.4665	-38.4252	-40.2314		212	-27.5485
211	-38.5201	-36.8868	-35.383	-36.6537	-38.2318	-40.6745		211	-33.9089	-29.9348	-36.0905	-38.2303	-38.4986	-44.1987		211	-38.2942	-39.649	-39.3389	-36.4605	-42.256	-36.7965		211	-38.2942	-39.649	-39.3389	-36.4605	-42.256	-36.7965		211	-39.0224	-37.4888	-39.3173	-36.7159	-34.7574	-33.2863		211	-41.2649	-41.3221	-34.3153	-38.4278	-35.5593	-35.8261		211	-28.5115
210	-38.9707	-38.0644	-36.4588	-37.1971	-38.9268	-38.9124		210	-34.2499	-30.8187	-36.7115	-38.584	-39.4913	-42.2283		210	-38.5895	-41.2702	-39.2041	-34.3636	-42.1738	-35.5298		210	-38.5895	-41.2702	-39.2041	-34.3636	-42.1738	-35.5298		210	-39.6548	-38.8746	-39.5339	-37.7356	-35.0157	-32.4256		210	-41.7919	-41.2296	-34.0185	-34.4013	-32.6366	-29.144		210	-29.0547
209	-38.136	-37.8578	-37.0083	-37.2201	-38.3882	-35.3635		209	-34.275	-31.6745	-36.102	-36.7544	-40.1965	-38.0378		209	-38.7159	-42.1022	-40.3325	-30.5534	-39.3479	-29.4206		209	-38.7159	-42.1022	-40.3325	-30.5534	-39.3479	-29.4206		209	-40.1643	-39.285	-39.5172	-37.6086	-34.3006	-31.5146		209	-40.589	-39.8926	-33.1616	-29.1007	-27.4746	-22.2976		209	-29.2296
208	-35.2944	-36.389	-36.4457	-36.1014	-37.4551	-32.9793		208	-32.2163	-31.8098	-33.7911	-32.7758	-34.8401	-29.2369		208	-37.4838	-37.1488	-39.26	-26.6971	-34.1294	-22.5422		208	-37.4838	-37.1488	-39.26	-26.6971	-34.1294	-22.5422		208	-38.9665	-37.5494	-38.9885	-35.5573	-31.835	-28.7838		208	-37.9609	-35.6284	-31.4451	-22.3634	-20.6725	-14.9954		208	-28.8685
207	-30.8769	-33.7609	-34.1389	-33.6933	-34.7648	-29.5481		207	-28.1641	-29.3922	-30.485	-27.4143	-27.9995	-19.8985		207	-32.1699	-27.7469	-35.9478	-22.0592	-27.4227	-13.9791		207	-32.1699	-27.7469	-35.9478	-22.0592	-27.4227	-13.9791		207	-36.526	-35.9304	-35.3926	-32.649	-30.0618	-23.706		207	-33.0563	-29.9203	-27.6585	-12.7259	-13.5037	-8.526		207	-27.3198
206	-25.6163	-29.4629	-28.1376	-29.3626	-31.5294	-23.4319		206	-24.1644	-24.8273	-23.7579	-21.7999	-21.3046	-7.4203		206	-25.7056	-20.0716	-30.4782	-14.5005	-18.576	-4.6116		206	-25.7056	-20.0716	-30.4782	-14.5005	-18.576	-4.6116		206	-31.8215	-32.4048	-31.1593	-27.1077	-26.3466	-17.1968		206	-26.0512	-22.3069	-21.2838	-5.6784	-6.1418	-2.4335		206	-25.274
205	-20.9057	-23.6291	-20.7692	-22.6776	-23.5854	-17.9278		205	-19.0567	-18.7055	-15.8624	-15.2851	-13.4997	4.39661		205	-20.2476	-15.4067	-23.3776	-8.2481	-9.1237	3.0229		205	-20.2476	-15.4067	-23.3776	-8.2481	-9.1237	3.0229		205	-24.1027	-27.5359	-24.5832	-20.3627	-19.3586	-10.0193		205	-17.7009	-12.8072	-12.1749	0.7032	0.1249	2.5741		205	-21.8807
204	-15.6829	-15.5224	-16.7301	-15.0451	-13.9554	-14.856		204	-11.8776	-9.725	-5.8578	-6.0564	-5.9125	12.8174		204	-13.5534	-7.4197	-13.0117	-3.6593	1.5576	11.7316		204	-13.5534	-7.4197	-13.0117	-3.6593	1.5576	11.7316		204	-15.0048	-19.1698	-14.9736	-14.5599	-11.5822	-2.52491		204	-6.2177	-3.3305	-2.2623	6.19032	8.33322	8.0985		204	-18.5233
203	-9.31682	-7.11642	-12.7532	-7.20512	-6.32637	-10.1255		203	-5.5435	1.7552	4.8613	3.993	2.3817	15.6425		203	-9.4723	2.3715	-2.2139	-0.1944	8.13797	18.1259		203	-9.4723	2.3715	-2.2139	-0.1944	8.13797	18.1259		203	-8.15932	-8.55982	-6.99122	-9.88302	-6.74422	2.24734		203	2.63684	7.33571	4.28498	8.52502	14.2532	14.7778		203	-15.062
202	-4.39622	-2.45337	-8.20609	-1.72002	-0.28224	-4.716		202	-2.6804	10.5506	14.373	13.724	6.33931	16.1577		202	-7.7912	7.7783	5.98113	1.9897	12.6991	19.1144		202	-7.7912	7.7783	5.98113	1.9897	12.6991	19.1144		202	-2.9002	-0.22454	-1.53625	-4.99073	-5.71019	3.89483		202	10.4792	13.521	11.8002	8.91059	14.2285	19.5353		202	-11.2883
201	-2.82628	-0.8314	-5.66514	1.70824	2.14767	-0.96946		201	-0.41838	13.4759	19.5644	19.96	6.89051	12.8634		201	-4.50089	9.21512	11.4156	6.6691	12.9421	14.8049		201	-4.50089	9.21512	11.4156	6.6691	12.9421	14.8049		201	1.27878	2.59466	4.12672	-3.50983	-7.09247	4.17751		201	15.0027	12.0127	15.3205	10.6277	12.96	22.5145		201	-9.08636
200	0.40253	2.08916	-4.36634	0.18147	1.44941	3.0813		200	2.86038	14.4214	19.9561	17.5813	7.28028	4.44046		200	0.02382	10.7297	12.3785	6.46754	10.8816	8.27012		200	0.02382	10.7297	12.3785	6.46754	10.8816	8.27012		200	0.88018	3.42356	7.08355	-6.7954	-5.62359	1.74098		200	15.877	7.40603	13.1348	9.71994	10.5463	19.8913		200	-8.14924
[truncated: 12 more columns]

## Sheet: Fig. 1f
Figure 1f	CD spectra at 216 nm
		Time (hr)	TrxHttex1-15Q	TrxHttex1-15Q+SERF1a			TrxHttex1-29Q	TrxHttex1-29Q+SERF1a			TrxHttex1-39Q	TrxHttex1-39Q+SERF1a			TrxHttex1-49Q	TrxHttex1-49Q+SERF1a
		0	-32.8415	-28.7118		0	-34.3729	-32.8936		0	-34.5481	-37.3891		0	-25.185	-22.8525
		3	-29.7076	-24.7826		3	-34.6039	-34.6529		3	-33.5768	-37.2533		3	-25.1616	-28.7075
		6	-29.3221	-31.3208		6	-32.9054	-34.5064		6	-35.5985	-33.3544		6	-24.3917	-26.8962
		12	-31.7906	-33.52		12	-35.2551	-34.67		12	-34.0622	-43.727		12	-28.9508	-25.522
		24	-31.1963	-32.4748		24	-32.8214	-36.5851		24	-32.5918	-42.3478		24	-27.6766	-27.0706
		40	-35.6996	-40.988		40	-35.4963	-37.4672		40	-34.3217	-46.5733		40	-29.6153	-29.2515

## Sheet: Fig. 2a
Figure 2a	Intrinsic fluorescence
		SERF1a concentration
			(μM)	Trx	TrxHttex1-15Q	TrxHttex1-29Q	TrxHttex1-39Q	TrxHttex1-49Q
			0	100	100	100	100	100
			2	100.067	100.101	99.164		98.4449
			4	100.74	100.222	98.4687	97.4227	96.9284
			6	99.0561	100.59	98.5468		95.8769
			8	99.153	99.024	100.057	96.2591
			10	98.6122	100.141	99.0832	95.6679
			15		98.9073	98.7122		89.0727
			20	98.5016	100.219	100.078	93.8733	86.9305
			25		100.319	97.9678	92.6483	84.8689
			30	98.0288	99.4722	97.3824	92.0807	82.6169
			35	98.4607	99.8766	98.4838	90.1295	81.7688
			40	97.5935	99.5707	96.4173	90.2952	81.5465
			50	98.3018	98.6629	95.3751	87.7559	79.0151
			75	96.851	98.7235	94.1955	85.2416	73.0847
			100	95.9291	97.0058	94.2154	83.6193	67.9963

## Sheet: Fig. 2b
Figure 2b	Intrinsic fluorescence
		SERF1a concentration
			(μM)	Httex1-15Q	Httex1-39Q
			0	99.994	100
			2	99.7906	100.209
			4	99.3313	97.2004
			6	99.2545	93.674
			8	99.0721	93.6749
			10	98.7337	90.6733
			15	98.4265	88.7462
			20	98.201	87.0385
			25	97.8285	84.0643
			30	97.9056	82.1864
			35	97.9597	81.237
			40	98.0904	79.0259
			50	97.5906	76.6717
			60	97.2558	72.6214
			70	97.0537	70.3141
			80	96.9104	69.6052
			90	96.6604	66.8778
			100	96.6625	64.5902

## Sheet: Fig. 2c
Figure 2c	Intrinsic fluorescence
		SERF1a concentration
			(μM)	TrxHttex1-15Q	TrxHttex1-15Q (5%TFE)	TrxHttex1-49Q	TrxHttex1-49Q (5%TFE)
			0	100	100	100	100
			2	99.4695		97.5996	94.1223
			4	99.1846		95.2131	95.2076
			6	98.2662			92.2457
			8	96.6098	96.6982	92.1795	89.4436
			10	99.3709	96.1106	90.8023	86.5272
			15	98.0716		89.0317	82.8271
			20	99.621		88.1711
			25		94.1893	88.1718
			30		93.8249	86.6324	77.2228
			35	99.1505	92.067		76.6765
			40	99.012	93.274	84.4754	76.0342
			50	97.7551	92.6636	82.7752	74.4841
			60		91.7815		72.9057
			70	94.6708	89.3569		71.8808
			80	97.4861	92.9351	80.6606	70.3503
			90	97.103	90.8005	80.5856	68.9377
			100	96.419	91.7723	79.6629	67.6689

## Sheet: Fig. 3c
Figure 3c	NMR chemical shift perturbation
M1	A2	R3	G4	N5	Q6	R7	E8	L9/E42	A10	R11	Q12	K13	N14	M15	K16	K17	T18/T59	Q19	E20/R26	I21	S22	K23	G24	K25	E20/R26	K27	E28	D29	S30	L31	T32	A33	S34	Q35	R36	K37/I43	Q38	R39	D40	S41	L9/E42	K37/I43	M44	Q45	E46	K47	Q48	K49	A50
0	0.0769016	0.0367034	0	0	0.0636491	0	0	0.0277694	0.114199	0.113054	0.0170188	0	0	0.0336387	0.0290489	0.0817389	0.061347	0.0640569	0.0999004	0.127351	0.0850808	0.177772	0.0796347	0.0648347	0.0999004	0.135219	0.0357136	0.0245153	0.0503219	0.099129	0.0652093	0.0071512	0.0372345	0.0454	0.0465434	0.0150748	0.029979	0	0.0187032	0.0559804	0.0277694	0.0150748	0.0632083	0.061902	0	0	0	0	0.0503017
[truncated: 12 more columns]

## Sheet: Fig. 3d
Figure 3d	NMR intensity change
M1	A2	R3	G4	N5	Q6	R7	E8	L9/E42	A10	R11	Q12	K13	N14	M15	K16	K17	T18/T59	Q19	E20/R26	I21	S22	K23	G24	K25	E20/R26	K27	E28	D29	S30	L31	T32	A33	S34	Q35	R36	K37/I43	Q38	R39	D40	S41	L9/E42	K37/I43	M44	Q45	E46	K47	Q48	K49	A50
0	0.400421	0.327049	0	0	0.284616	0	0	0.166347	0.133051	0.181057	0.357099	0	0	0.426021	0.407692	0.393407	0.398475	0.283704	0.350676	0.309767	0.32173	0.384191	0.567274	0.374861	0.350676	0.398153	0.347056	0.310989	0.429965	0.479332	0.287245	0.276671	0.344735	0.163098	0.275395	0.289342	0.216267	0	0.311093	0.327293	0.166347	0.289342	0.345767	0.345442	0	0	0	0	0.278039
[truncated: 12 more columns]

## Sheet: Fig. 4b
Figure 4b	CD spectra
			Wavelength (nm)	Htt-0	Htt-1	Htt-2	Htt-3	Htt-4	Htt-5	NT17
			250	-0.59963	-0.08639	-0.22945	-1.45555	-0.44818	-0.33131	-0.2858
			249	-0.60903	-0.13502	-0.20386	-1.42168	-0.45183	-0.41794	-0.45802
			248	-0.67336	-0.20815	-0.13386	-1.34023	-0.45059	-0.49931	-0.64241
			247	-0.58381	-0.28394	-0.06694	-1.25159	-0.45454	-0.6421	-0.73231
			246	-0.4357	-0.37942	-0.05403	-1.11782	-0.45804	-0.74624	-0.85803
			245	-0.345	-0.53273	-0.17228	-1.06803	-0.49718	-0.92951	-0.91827
			244	-0.44773	-0.76723	-0.33917	-1.07243	-0.56611	-1.12784	-0.86026
			243	-0.52254	-1.03754	-0.44141	-1.00413	-0.58514	-1.19804	-0.73655
			242	-0.84125	-1.40785	-0.63362	-1.16804	-0.65337	-1.25984	-0.6129
			241	-1.28904	-1.91021	-0.99708	-1.4184	-0.78783	-1.33757	-0.8005
			240	-1.81186	-2.56592	-1.53643	-1.71991	-1.01174	-1.53167	-1.05189
			239	-2.2126	-3.37191	-2.10821	-1.87726	-1.19814	-1.67887	-1.378
			238	-2.68691	-4.3749	-2.59844	-2.024	-1.34283	-1.83472	-1.73121
			237	-3.42095	-5.62016	-2.9881	-2.2714	-1.49317	-1.96125	-2.07336
			236	-4.21025	-7.06722	-3.4557	-2.55151	-1.6211	-2.12148	-2.62251
			235	-4.85663	-8.63984	-3.86042	-2.67084	-1.62917	-2.23108	-3.09673
			234	-5.63279	-10.4327	-4.3342	-2.79804	-1.68986	-2.49188	-3.46703
			233	-6.45709	-12.4234	-4.9453	-3.03468	-1.78564	-2.95282	-3.83021
			232	-7.33154	-14.5279	-5.67683	-3.28422	-1.85769	-3.35851	-4.13174
			231	-8.26047	-16.7067	-6.44036	-3.55331	-1.9095	-3.68815	-4.47999
			230	-9.33345	-18.9123	-7.20255	-3.87082	-1.96924	-4.04356	-4.86983
			229	-10.2217	-21.0267	-8.03457	-4.18118	-1.92907	-4.28142	-5.25373
			228	-11.4403	-23.0339	-9.12439	-4.85606	-2.0278	-4.69738	-5.53394
			227	-12.6198	-24.8125	-10.1637	-5.51037	-2.11856	-5.17608	-5.67465
			226	-13.5486	-26.3165	-11.1441	-5.95136	-2.23478	-5.63501	-5.77442
			225	-14.2254	-27.4928	-11.9574	-6.14144	-2.35164	-5.80503	-5.66768
			224	-14.6544	-28.2985	-12.4196	-6.18048	-2.39469	-5.85506	-5.46919
			223	-14.9654	-28.7386	-12.5952	-6.1041	-2.41084	-5.93604	-5.06745
			222	-15.0841	-28.8494	-12.7121	-6.064	-2.48507	-6.0949	-4.54269
			221	-15.1493	-28.7149	-12.6659	-6.03197	-2.66511	-6.16635	-3.9892
			220	-15.0988	-28.3742	-12.6049	-6.08922	-2.95897	-6.16529	-3.41073
			219	-14.9615	-27.8614	-12.5538	-6.32509	-3.3528	-6.25284	-2.99229
			218	-14.7794	-27.174	-12.3767	-6.59101	-3.85526	-6.14278	-2.6901
			217	-14.5404	-26.5307	-12.3066	-6.88294	-4.44808	-6.04349	-2.20687
			216	-14.5077	-26.1106	-12.6004	-7.46074	-5.25582	-6.50308	-1.94353
			215	-14.5277	-25.802	-13.0283	-8.2528	-6.15997	-7.04672	-2.11208
			214	-14.7425	-25.7439	-13.5779	-9.2495	-7.23667	-7.75408	-2.55822
			213	-15.2049	-25.9102	-14.2477	-10.2381	-8.35435	-8.8307	-3.02858
			212	-15.9636	-26.2129	-15.3344	-11.3778	-9.67407	-10.2205	-3.86325
			211	-17.2471	-26.5214	-16.7413	-12.6091	-11.1754	-11.6832	-5.05858
			210	-18.8397	-26.6259	-18.2257	-13.9744	-12.688	-13.3537	-6.42743
			209	-20.3832	-26.2646	-19.6204	-15.4554	-14.3247	-15.2378	-8.36688
			208	-22.0055	-25.3137	-21.2538	-17.0762	-16.0406	-17.1809	-10.619
			207	-23.7417	-23.6493	-22.7693	-18.7198	-17.9339	-19.0926	-12.9713
			206	-25.0264	-20.9257	-23.9713	-20.4315	-19.7459	-20.904	-15.5112
			205	-26.0954	-17.1466	-24.7863	-22.2883	-21.4294	-22.601	-18.3548
			204	-26.7469	-12.0324	-25.0983	-23.8704	-22.9594	-23.9497	-21.071
			203	-26.3904	-5.44354	-24.8418	-25.1256	-24.128	-25.0236	-23.2446
			202	-24.922	2.41196	-23.8333	-26.0296	-25.1089	-25.7011	-24.9466
			201	-22.3099	11.3086	-21.6945	-26.2248	-25.7662	-25.5888	-25.8774
			200	-18.6481	20.7531	-18.9825	-25.5494	-25.8572	-25.2247	-25.5734
			199	-14.4951	30.2559	-15.8562	-24.5071	-25.5017	-24.2953	-24.5134
			198	-10.0347	39.2278	-12.4262	-22.9811	-24.7237	-22.3718	-22.5775
			197	-5.28569	47.291	-8.54143	-20.8279	-23.4391	-19.9731	-19.6431
			196	-0.40357	53.7732	-4.49215	-18.0537	-21.6516	-17.4482	-16.0853
			195	4.46331	58.5455	-0.60457	-14.8187	-19.6234	-15.0309	-12.9752
			194	8.60903	61.4979	2.68556	-11.4614	-17.5112	-12.9527	-11.233
			193	11.8313	62.7582	5.58972	-8.32576	-15.5683	-11.3301	-10.6678
			192	14.296	62.6882	7.94811	-5.6799	-13.7145	-10.1183	-11.2432
			191	15.8592	61.6188	9.57208	-3.54989	-12.087	-9.33695	-12.5824
			190	16.7924	60.2273	10.6019	-1.81838	-10.8034	-9.0029	-14.2075

## Sheet: Fig. 4c
Figure 4c	ITC data
Htt-0									Htt-3									NT17
DH	INJV	Xt	Mt	XMt	NDH	Fit	DY		DH	INJV	Xt	Mt	XMt	NDH	Fit	DY		DH	INJV	Xt	Mt	XMt	NDH	Fit	DY
-0.18625	0.5	0	0.03	0.02428	--	-1972.29	--		-0.03738	0.5	0	0.05	0.01214	--	-1482.13	--		0.07383	0.5	0	0.05	0.01214	--	--	-1212.69
-1.16867	2	0.000726567	0.02993	0.12198	-1947.78	-1938.75	-9.03119		-1.07424	1.5	0.000605473	0.04988	0.04873	--	-1479.81	--		-0.5349	1.5	0.000605473	0.04988	0.04873	--	--	-1212.11
-1.18327	2	0.00362	0.02964	0.22062	-1972.12	-1885.77	-86.3539		-0.86668	1.5	0.00241	0.04952	0.08559	-1465.38	-1475.6	10.2127		-0.72854	1.5	0.00241	0.04952	0.08559	-1228.73	-17.7337	-1211
-1.10151	2	0.00648	0.02935	0.3202	-1835.86	-1833.61	-2.24348		-0.87236	1.5	0.00421	0.04916	0.12271	-1480.52	-1470.15	-10.3701		-0.75711	1.5	0.00421	0.04916	0.12271	-1304.91	-95.4525	-1209.46
-1.04665	2	0.00931	0.02907	0.42072	-1744.42	-1782.32	37.8986		-0.87503	1.5	0.00599	0.0488	0.1601	-1487.64	-1463.01	-24.6293		-0.6509	1.5	0.00599	0.0488	0.1601	--	--	-1207.31
-1.02529	2	0.01211	0.02879	0.52218	-1708.82	-1731.9	23.0836		-0.86237	1.5	0.00776	0.04845	0.19775	-1453.87	-1453.47	-0.40829		-0.75016	1.5	0.00776	0.04845	0.19775	-1286.38	-82.1805	-1204.2
-0.98768	2	0.01489	0.02851	0.62458	-1646.13	-1682.39	36.2591		-0.85897	1.5	0.00951	0.0481	0.23567	-1444.82	-1440.37	-4.45225		-0.70829	1.5	0.00951	0.0481	0.23567	-1174.73	24.7847	-1199.51
-0.94859	2	0.01763	0.02823	0.72793	-1580.99	-1633.81	52.8158		-0.87085	1.5	0.01125	0.04775	0.27385	-1476.49	-1421.84	-54.6496		-0.68202	1.5	0.01125	0.04775	0.27385	-1104.69	87.2368	-1191.92
-0.94793	2	0.02035	0.02796	0.83221	-1579.88	-1586.16	6.27966		-0.84759	1.5	0.01298	0.0474	0.31229	-1414.48	-1394.66	-19.8161		-0.70361	1.5	0.01298	0.0474	0.31229	-1162.25	16.1521	-1178.4
-0.91658	2	0.02305	0.02769	0.93743	-1527.63	-1539.48	11.8484		-0.80719	1.5	0.0147	0.04706	0.351	-1306.75	-1353.18	46.4276		-0.68884	1.5	0.0147	0.04706	0.351	-1122.87	27.8641	-1150.73
-0.9227	2	0.02571	0.02742	1.0436	-1537.83	-1493.76	-44.0723		-0.84788	1.5	0.0164	0.04672	0.38997	-1415.25	-1287.43	-127.822		-0.6674	1.5	0.0164	0.04672	0.38997	-1065.7	16.7788	-1082.48
-0.89575	2	0.02834	0.02716	1.15071	-1492.92	-1449.02	-43.9002		-0.66629	1.5	0.01809	0.04638	0.42921	-931.006	-1181.26	250.258		-0.57845	1.5	0.01809	0.04638	0.42921	-828.488	59.0022	-887.49
-0.84348	2	0.03095	0.0269	1.25875	-1405.8	-1405.26	-0.54617		-0.74441	1.5	0.01976	0.04604	0.46872	--	-1015.83	--		-0.47783	1.5	0.01976	0.04604	0.46872	-560.187	-64.6941	-495.493
-0.80405	2	0.03353	0.02664	1.36774	-1340.08	-1362.48	22.4049		-0.6086	1.5	0.02142	0.04571	0.50849	-777.162	-791.466	14.3038		-0.35642	1.5	0.02142	0.04571	0.50849	-236.426	-39.9784	-196.447
-0.80729	2	0.03608	0.02638	1.47767	-1345.48	-1320.69	-24.7892		-0.58591	1.5	0.02307	0.04537	0.54852	-716.666	-554.433	-162.233		-0.25041	1.5	0.02307	0.04537	0.54852	46.273	131.448	-85.1746
-0.77128	2	0.0386	0.02612	1.58854	-1285.47	-1279.88	-5.59092		-0.46779	1.5	0.02471	0.04504	0.58882	-401.673	-364.281	-37.3916		-0.25299	1.5	0.02471	0.04504	0.58882	39.4049	84.1155	-44.7106
-0.74168	2	0.04109	0.02587	1.70035	-1236.13	-1240.05	3.91467		-0.41173	1.5	0.02633	0.04472	0.62938	-252.176	-238.109	-14.0671		-0.22016	1.5	0.02633	0.04472	0.62938	126.936	153.842	-26.9056
-0.72187	2	0.04356	0.02562	1.8131	-1203.11	-1201.19	-1.91733		-0.32599	1.5	0.02794	0.04439	0.6702	-23.5485	-160.368	136.82		-0.24718	1.5	0.02794	0.04439	0.6702	54.8783	72.602	-17.7238
-0.68761	2	0.04599	0.02537	1.92679	-1146.01	-1163.3	17.2906		-0.31752	1.5	0.02954	0.04407	0.71129	-0.95824	-112.427	111.468		-0.27568	1.5	0.02954	0.04407	0.71129	-21.109	-8.69242	-12.4165
-0.69183	2	0.0484	0.02512	2.04143	-1153.05	-1126.37	-26.6824		-0.30643	1.5	0.03112	0.04375	0.75265	28.6268	-81.901	110.528		-0.22778	1.5	0.03112	0.04375	0.75265	106.624	115.706	-9.08203
	--	0.05078	0.02488	--					-0.33966	1.5	0.03269	0.04343	0.79427	-59.9975	-61.6737	1.67625		-0.28014	1.5	0.03269	0.04343	0.79427	-32.9926	-26.1425	-6.85003
									-0.30627	1.5	0.03424	0.04311	0.83615	29.0377	-47.7412	76.7789		-0.30414	1.5	0.03424	0.04311	0.83615	-97.0081	-91.7284	-5.27964
									-0.29426	1.5	0.03579	0.0428	0.8783	61.0834	-37.8047	98.8881		-0.28607	1.5	0.03579	0.0428	0.8783	-48.8302	-44.7011	-4.129
									-0.34134	1.5	0.03732	0.04249	0.92072	-64.4584	-30.4991	-33.9592		-0.29942	1.5	0.03732	0.04249	0.92072	-84.4212	-81.1643	-3.25684
									-0.33931	1.5	0.03883	0.04218	0.9634	-59.0463	-24.9838	-34.0625		-0.2313	1.5	0.03883	0.04218	0.9634	97.2331	99.8094	-2.57628
									-0.30464	1.5	0.04034	0.04187	1.00634	33.3835	-20.7227	54.1063		-0.27257	1.5	0.04034	0.04187	1.00634	-12.8119	-10.7804	-2.03157
										--	0.04183	0.04156	--						--	0.04183	0.04156	--

[truncated: 10 more sheets: Fig. 4d, Fig. 4e, Fig. 5a, Fig. 5b, Fig. 5e, Fig. 6c, Fig. 7c, Fig. 8a, Fig. 8b, Fig. 8c]
